# Supplementary material for: Transversus Abdominis Release (TAR) Procedure: Experience of An Abdominal Wall Reconstruction Group.
Source: Research Square preprint supplement (doi:10.21203/rs.3.rs-766601/v1), 2021-08-09
Supplement: Supplementary file 1 [file b3fb34b50c40252073dfe791.docx]

**Appendix**

| **Table 1. Demographics and Baseline characteristics** | | | |
| --- | --- | --- | --- |
| **Variable** | | ***n*** | **%** |
| **Gender** | **Male** | **31** | **62** |
| **Female** | **19** | **38** |
| **Past History** | **High Blood Pressure** | **17** | **34** |
| **Dibetes Mellitus**  **Type 2** | **7** | **14** |
| **Kidney Disease** | **1** | **2** |
| **COPD** | **3** | **6** |
| **Coronary Disease** | **3** | **6** |
| **Thyroid**  **Disease** | **10** | **20** |
| **Smoking**  **history** | **8** | **16** |
| **Smoking 3 months**  **previously** | **9** | **18** |
| **Previous**  **reconstruction** | **13** | **26** |
| **Estreoids**  **consumption** | **1** | **2** |
| **Chemotherapy in previous 6 months.** | **0** | **0** |
| **Previous**  **laparotomy** | **46** | **92** |
| **Appendectomy** | **11** | **22** |
| **Nephrectomy** | **2** | **4** |
| **Open**  **cholecystectomy** | **8** | **16** |
| **Intestinal**  **resection.** | **24** | **48** |
|  | | **Mean** | **SD** |
| **Age** | | **55** | **13,4** |
| **BMI** | | **27,8** | **4,5** |

| **Table 2. Preoperative Characteristics** | | | |
| --- | --- | --- | --- |
| **Variable** | | ***n*** | **%** |
| **Botox**  **therapy** | | **2** | **4** |
| **Previous**  **pneumoperitoneum** | | **9** | **18** |
| **Emergency**  **surgery** | | **4** | **8** |
| **Recurrent**  **hernia** | | **10** | **20** |
|  | | **Mean** | **SD** |
| **CeDAR** | | **20,5** | **14,5** |
| **GAP (cm)** | | **11,49** | **4,03** |
| **Volume (cc)**** | | **2700** | **3219** |
|  | | ***n*** | **%** |
| **Hernia Classification** | **M1** | **21** | **42** |
| **M2** | **24** | **48** |
| **M3** | **29** | **58** |
| **M4** | **28** | **56** |
| **M5** | **24** | **48** |
| **W1** | **2** | **4** |
| **W2** | **10** | **20** |
| **W3** | **36** | **72** |
| **** Median and Intequartile range** | | | |

| **Table 3. Intraoperative Characteristics** | | | |
| --- | --- | --- | --- |
| **Variable** | | **n** | **%** |
| **Mesh** | **Polypropilene** | **45** | **90** |
| **Composed** | **5** | **10** |
| **Fixation Method** | **Self-fixation** | **1** | **2** |
| **Continous suture** | **23** | **46** |
| **Separate suture** | **34** | **68** |
| **Tackers** | **2** | **4** |
| **Other intraoperative procedures** | | **10** | **20** |
|  |  | **Mean** | **SD** |
| **Surgery** | **Intraoperative Bleeding (min)**** | **275** | **157** |
| **Surgical**  **time** | **225** | **59,9** |
| **In-Hospital stay**  **(Days)** | **7,4** | **6,1** |
| **** Median and Intequartile range** | | | |

| **Table 4. Complications and Follow up** | | | |
| --- | --- | --- | --- |
|  | **Variable** | **n** | **%** |
| **Follow up** | **Follow**  **up (Months)*** | **35,72** | **17,97** |
| ***Relapse*** | ***6*** | **12** |
| ***12 Months*** | ***2*** | **4** |
| ***> 12 Months*** | ***4*** | **8** |
| ***Complications*** | ***Hematoma*** | ***1*** | **2** |
| ***Seroma*** | ***4*** | **8** |
| ***Superficial (SSI)*** | ***5*** | **10** |
| ***Deep (SSI)*** | ***2*** | **4** |
| ***Organ space (SSI)*** | ***1*** | **2** |
| ***Other complications*** | ***Pulmonary***  ***Embolism*** | ***3*** | **6** |
| ***Pneumonia*** | ***1*** | **2** |
| ***Re-intervention*** | ***5*** | **10** |
| ***Mean and standard deviation** | | | |

| **Table 5 Statistical Analysis** | | | |
| --- | --- | --- | --- |
|  | **Outcome** | | |
|  | **Relapse** | | |
| **Variable** | **OR** | **IC (95%)** | **P value** |
| **Diabetes Mellitus** | **0.75** | **0.5-0.9** | **0.131** |
| **Smoking habit** | **0.55** | **0.3-0.7** | **0.05** |
| **Recurrent hernia** | **0.66** | **0.2-0.8** | **0.122** |
|  | **Hematoma** | | |
| **Smoking habit** | **0.49** | **0.2-0.63** | **0.02** |
| **Preoperative botox** | **1.0** | **0.3-1.1** | **0.00** |
| **Pneumoperitoneum** | **0.7** | **0.3-0.89** | **0.05** |
|  | **Seroma** | | |
| **Emergency Context** | **0.9** | **0.5-1.1** | **0.2** |
| **Surgery performed by AWRG** | **1.0** | **0.8-1.2** | **0.2** |
|  | **SSI** | | |
| **Diabetes Mellitus** | **1.1** | **0.66-1.35** | **0.01** |
| **COPD** | **0.5** | **0.25-0.65** | **0.08** |
| **Surgery performed by AWGR** | **0.07** | **0.05-0,1** | **0.009** |
| **Surgery performed by non AWRG** | **13.6** | **9.5-15.1** | **0.04** |
|  | **Re-intervention** | | |
| **Renal impairment** | **1.5** | **0.9-1.2** | **0.001** |

| **Table 6. Life Quality** | | |
| --- | --- | --- |
| **Short - Form** | **Mean** | **Standard Deviation** |
| **Physical function** | **77.1** | **6.5** |
| **Role limitation** | **83.8** | **11.4** |
| **Emotional limitation** | **79.32** | **15.8** |
| **Energy limitation** | **81** | **14.8** |
| **Social function** | **88.5** | **12.34** |
| **Pain** | **92.3** | **7.19** |
| **Over**  **all health** | **89.32** | **12.6** |
| **Change in health** | **93.8** | **7.7** |
